# Supplementary material
Source: HighWire-hosted journal article supplement (https://bmjopen.bmj.com/content/7/9/e015830)
Supplement: inline-supplementary-material-1 [file inline-supplementary-material-1.pdf]

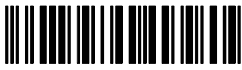

# ACORN PRACTITIONER QUESTIONNAIRE

## Chiropractic practitioner characteristics

**Q1 What is your age in years?**

**Q2 What is your gender?**

- Male  
 Female

**Q3 Are you currently in private chiropractic practice?**

- No  
 Yes, how many years?

**Q4 What is the highest level of chiropractic professional qualification that you hold?**

- Diploma  Masters degree  
 Advanced Diploma  PhD  
 Bachelor (or Double Bachelor) degree  
 Doctor of Chiropractic

**Q5 Are you a member of any of the following professional chiropractic organisations? (select all that apply)**

- CAA  CAA and COCA  
 COCA  None  
 Other(s) (Please specify)

**Q6 Indicate all the roles in which you have been involved as a chiropractor over the last 12 months: (select all that apply)**

- University teaching  
 Research  
 Clinical supervision  
 Volunteer work  
 Private practice  
 Professional organisation activities

**Q7 Do you routinely consult patients in a language other than English?**

- No  
 Yes (Please specify)

## Practice characteristics

**Q8 How many of the following would you provide on average, per week?**

- a) Patient care hours   
b) Patient visits

**Q9 Do you practice in more than one location?**

- No  
 Yes, how many in total

**Q10 Indicate all other health professionals working in your practice location(s): (select all that apply)**

- GP  Exercise Physiologist  
 Podiatrist  Psychologist/Counsellor  
 Medical specialist  Occupational Therapist  
 Physiotherapist  None  
 Another Chiropractor  Other(s) (Please specify)

**Q11 Do you have a professional referral relationship (sending and/or receiving referrals) with any of the following practitioners: (select all that apply)**

- GP  Medical specialist  
 Psychologist/Counsellor  Exercise Physiologist  
 Physiotherapist  None  
 Occupational Therapist  Other(s) (Please specify)  
 Podiatrist

**Q12 In which state/territory do you practice? (select all that apply)**

- NSW VIC QLD WA SA TAS NT ACT

**Q13 Which of the following best describes your practice location(s)? (select all that apply)**

- Urban  Rural  Remote

**Q14 How frequently do you use diagnostic imaging as part of your practice?**

- Never  Rarely  Sometimes  Often

**Q15 Indicate all imaging facilities or scanning tools you have on site: (select all that apply)**

- X-ray  Thermography  
 MRI  None  
 SEMG  Other(s) (Please specify)  
 Diagnostic Ultrasound

**Q16 Indicate when you use electronic records: (select all that apply)**

- Initial History  Examination findings  
 Subsequent patient visits  Never

## Clinical management

**Q17 Indicate the frequency with which you discuss the following as part of your care/management plans:**

|                                                               | Never                    | Rarely                   | Sometimes                | Often                    |
|---------------------------------------------------------------|--------------------------|--------------------------|--------------------------|--------------------------|
| Diet / nutrition                                              | <input type="checkbox"/> | <input type="checkbox"/> | <input type="checkbox"/> | <input type="checkbox"/> |
| Smoking / Drugs / Alcohol                                     | <input type="checkbox"/> | <input type="checkbox"/> | <input type="checkbox"/> | <input type="checkbox"/> |
| Physical Activity / Fitness                                   | <input type="checkbox"/> | <input type="checkbox"/> | <input type="checkbox"/> | <input type="checkbox"/> |
| Occupational Health and Safety                                | <input type="checkbox"/> | <input type="checkbox"/> | <input type="checkbox"/> | <input type="checkbox"/> |
| Pain Counselling                                              | <input type="checkbox"/> | <input type="checkbox"/> | <input type="checkbox"/> | <input type="checkbox"/> |
| Nutritional Supplements (including vitamins, minerals, herbs) | <input type="checkbox"/> | <input type="checkbox"/> | <input type="checkbox"/> | <input type="checkbox"/> |
| Medication (including for pain / inflammation)                | <input type="checkbox"/> | <input type="checkbox"/> | <input type="checkbox"/> | <input type="checkbox"/> |
| Other (Please specify)                                        | <input type="checkbox"/> | <input type="checkbox"/> | <input type="checkbox"/> | <input type="checkbox"/> |

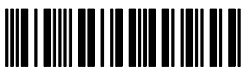**Q18 Indicate the frequency with which you treat patients that present with the following conditions:**

|                                                                     | Never                    | Rarely                   | Sometimes                | Often                    |                                                                       | Never                    | Rarely                   | Sometimes                | Often                    |
|---------------------------------------------------------------------|--------------------------|--------------------------|--------------------------|--------------------------|-----------------------------------------------------------------------|--------------------------|--------------------------|--------------------------|--------------------------|
| Neck pain (axial)                                                   | <input type="checkbox"/> | <input type="checkbox"/> | <input type="checkbox"/> | <input type="checkbox"/> | Postural disorders (including lordosis, thoracic kyphosis, scoliosis) | <input type="checkbox"/> | <input type="checkbox"/> | <input type="checkbox"/> | <input type="checkbox"/> |
| Neck pain (referred/radicular)                                      | <input type="checkbox"/> | <input type="checkbox"/> | <input type="checkbox"/> | <input type="checkbox"/> | Degenerative spine conditions (including spondylolisthesis)           | <input type="checkbox"/> | <input type="checkbox"/> | <input type="checkbox"/> | <input type="checkbox"/> |
| Thoracic pain (axial)                                               | <input type="checkbox"/> | <input type="checkbox"/> | <input type="checkbox"/> | <input type="checkbox"/> | Headache disorders (including cervicogenic, tension)                  | <input type="checkbox"/> | <input type="checkbox"/> | <input type="checkbox"/> | <input type="checkbox"/> |
| Thoracic pain (referred/radicular)                                  | <input type="checkbox"/> | <input type="checkbox"/> | <input type="checkbox"/> | <input type="checkbox"/> | Migraine disorders                                                    | <input type="checkbox"/> | <input type="checkbox"/> | <input type="checkbox"/> | <input type="checkbox"/> |
| Low back pain (axial)                                               | <input type="checkbox"/> | <input type="checkbox"/> | <input type="checkbox"/> | <input type="checkbox"/> | Spinal health maintenance/prevention                                  | <input type="checkbox"/> | <input type="checkbox"/> | <input type="checkbox"/> | <input type="checkbox"/> |
| Low back pain (referred/radicular)                                  | <input type="checkbox"/> | <input type="checkbox"/> | <input type="checkbox"/> | <input type="checkbox"/> | Non-musculoskeletal disorders (Please specify)                        | <input type="checkbox"/> | <input type="checkbox"/> | <input type="checkbox"/> | <input type="checkbox"/> |
| Lower limb musculoskeletal disorders (hip, knee, ankle, foot)       | <input type="checkbox"/> | <input type="checkbox"/> | <input type="checkbox"/> | <input type="checkbox"/> | <input type="text"/>                                                  | <input type="checkbox"/> | <input type="checkbox"/> | <input type="checkbox"/> | <input type="checkbox"/> |
| Upper limb musculoskeletal disorders (shoulder, elbow, wrist, hand) | <input type="checkbox"/> | <input type="checkbox"/> | <input type="checkbox"/> | <input type="checkbox"/> | Other (Please specify)                                                | <input type="checkbox"/> | <input type="checkbox"/> | <input type="checkbox"/> | <input type="checkbox"/> |
|                                                                     |                          |                          |                          |                          | <input type="text"/>                                                  |                          |                          |                          |                          |

**Q19 Indicate the frequency with which you treat the following patient subgroups:**

|                                              | Never                    | Rarely                   | Sometimes                | Often                    |                                                       | Never                    | Rarely                   | Sometimes                | Often                    |
|----------------------------------------------|--------------------------|--------------------------|--------------------------|--------------------------|-------------------------------------------------------|--------------------------|--------------------------|--------------------------|--------------------------|
| Children (up to 3 years)                     | <input type="checkbox"/> | <input type="checkbox"/> | <input type="checkbox"/> | <input type="checkbox"/> | People with work-related injuries                     | <input type="checkbox"/> | <input type="checkbox"/> | <input type="checkbox"/> | <input type="checkbox"/> |
| Children (4 to 18 years)                     | <input type="checkbox"/> | <input type="checkbox"/> | <input type="checkbox"/> | <input type="checkbox"/> | People with traffic-related injuries                  | <input type="checkbox"/> | <input type="checkbox"/> | <input type="checkbox"/> | <input type="checkbox"/> |
| Older people (65 years or over)              | <input type="checkbox"/> | <input type="checkbox"/> | <input type="checkbox"/> | <input type="checkbox"/> | People receiving post-surgical rehabilitation         | <input type="checkbox"/> | <input type="checkbox"/> | <input type="checkbox"/> | <input type="checkbox"/> |
| Aboriginal and Torres Strait Islander people | <input type="checkbox"/> | <input type="checkbox"/> | <input type="checkbox"/> | <input type="checkbox"/> | Non-English speaking ethnic group(s) (Please specify) | <input type="checkbox"/> | <input type="checkbox"/> | <input type="checkbox"/> | <input type="checkbox"/> |
|                                              |                          |                          |                          |                          | <input type="text"/>                                  |                          |                          |                          |                          |
| Pregnant women                               | <input type="checkbox"/> | <input type="checkbox"/> | <input type="checkbox"/> | <input type="checkbox"/> | Other (Please specify)                                | <input type="checkbox"/> | <input type="checkbox"/> | <input type="checkbox"/> | <input type="checkbox"/> |
|                                              |                          |                          |                          |                          | <input type="text"/>                                  |                          |                          |                          |                          |
| Athletes or sports people                    | <input type="checkbox"/> | <input type="checkbox"/> | <input type="checkbox"/> | <input type="checkbox"/> |                                                       |                          |                          |                          |                          |

**Q20 Indicate the frequency with which you employ the following Techniques/Methods in your patient management:**

|                                                                       | Never                    | Rarely                   | Sometimes                | Often                    |                                                  | Never                    | Rarely                   | Sometimes                | Often                    |
|-----------------------------------------------------------------------|--------------------------|--------------------------|--------------------------|--------------------------|--------------------------------------------------|--------------------------|--------------------------|--------------------------|--------------------------|
| Drop-piece techniques / Thompson® or similar                          | <input type="checkbox"/> | <input type="checkbox"/> | <input type="checkbox"/> | <input type="checkbox"/> | Applied Kinesiology® (AK)                        | <input type="checkbox"/> | <input type="checkbox"/> | <input type="checkbox"/> | <input type="checkbox"/> |
| Biomechanical pelvic blocking / Sacro-Occipital Technique®            | <input type="checkbox"/> | <input type="checkbox"/> | <input type="checkbox"/> | <input type="checkbox"/> | Flexion-distraction                              | <input type="checkbox"/> | <input type="checkbox"/> | <input type="checkbox"/> | <input type="checkbox"/> |
| Instrument adjusting                                                  | <input type="checkbox"/> | <input type="checkbox"/> | <input type="checkbox"/> | <input type="checkbox"/> | Functional Neurology                             | <input type="checkbox"/> | <input type="checkbox"/> | <input type="checkbox"/> | <input type="checkbox"/> |
| Chiropractic BioPhysics®                                              | <input type="checkbox"/> | <input type="checkbox"/> | <input type="checkbox"/> | <input type="checkbox"/> | Extremity manipulation                           | <input type="checkbox"/> | <input type="checkbox"/> | <input type="checkbox"/> | <input type="checkbox"/> |
| High velocity, low amplitude adjustment / manipulation / mobilisation | <input type="checkbox"/> | <input type="checkbox"/> | <input type="checkbox"/> | <input type="checkbox"/> | Other technique or intervention (Please specify) | <input type="checkbox"/> | <input type="checkbox"/> | <input type="checkbox"/> | <input type="checkbox"/> |
|                                                                       |                          |                          |                          |                          | <input type="text"/>                             |                          |                          |                          |                          |

**Q21 Indicate the frequency with which you employ the following Musculoskeletal Interventions in your patient management:**

|                                                                         | Never                    | Rarely                   | Sometimes                | Often                    |                                                            | Never                    | Rarely                   | Sometimes                | Often                    |
|-------------------------------------------------------------------------|--------------------------|--------------------------|--------------------------|--------------------------|------------------------------------------------------------|--------------------------|--------------------------|--------------------------|--------------------------|
| Dry needling or Acupuncture                                             | <input type="checkbox"/> | <input type="checkbox"/> | <input type="checkbox"/> | <input type="checkbox"/> | Orthotics (foot care)                                      | <input type="checkbox"/> | <input type="checkbox"/> | <input type="checkbox"/> | <input type="checkbox"/> |
| Soft tissue therapy, trigger point therapy, massage therapy, stretching | <input type="checkbox"/> | <input type="checkbox"/> | <input type="checkbox"/> | <input type="checkbox"/> | Specific exercise therapy / rehabilitation / injury taping | <input type="checkbox"/> | <input type="checkbox"/> | <input type="checkbox"/> | <input type="checkbox"/> |
| Electro-modalities (TENS, laser, interferential/ultrasound therapy)     | <input type="checkbox"/> | <input type="checkbox"/> | <input type="checkbox"/> | <input type="checkbox"/> | Other (Please specify)                                     | <input type="checkbox"/> | <input type="checkbox"/> | <input type="checkbox"/> | <input type="checkbox"/> |
|                                                                         |                          |                          |                          |                          | <input type="text"/>                                       |                          |                          |                          |                          |
| Heat / cryotherapy                                                      | <input type="checkbox"/> | <input type="checkbox"/> | <input type="checkbox"/> | <input type="checkbox"/> |                                                            |                          |                          |                          |                          |
